# Supplementary material for: A type-I van der Waals heterostructure formed by monolayer WS2 and trilayer PdSe2
Source: Royal Society of Chemistry journal article supplement (doi:10.1039/d4nr02664k), 2024-01-01
Supplement: d4nr02664k1.pdf [file d4nr02664k1.pdf]

# A Type-I van der Waals Heterostructure formed by Monolayer WS<sub>2</sub> and Trilayer PdSe<sub>2</sub>

Guili Li,<sup>a</sup> Xiaoxian Zhang,<sup>a</sup> Yongsheng Wang,<sup>a</sup> XiaoJing Liu,<sup>a</sup> FangYing Ren,<sup>a</sup> Jiaqi He,<sup>\*b</sup> Dawei He<sup>\*a</sup> and Hui Zhao<sup>\*c</sup>

<sup>a</sup> Key Laboratory of Luminescence and Optical Information, Ministry of Education, Institute of Optoelectronic Technology, Beijing Jiaotong University, Beijing 100044, China. E-mail: dwhe@bjtu.edu.cn

<sup>b</sup> College of Mathematics and Physics, Beijing University of Chemical Technology, Beijing 100029, China. E-mail: jqhe@buct.edu.cn

<sup>c</sup> Department of Physics and Astronomy, The University of Kansas, Lawrence, Kansas 66045, USA. E-mail: huizhao@ku.edu; Fax: +1 785 864 5262; Tel: +1 785 864 1938

## 1. X-ray photoelectron spectroscopy (XPS)

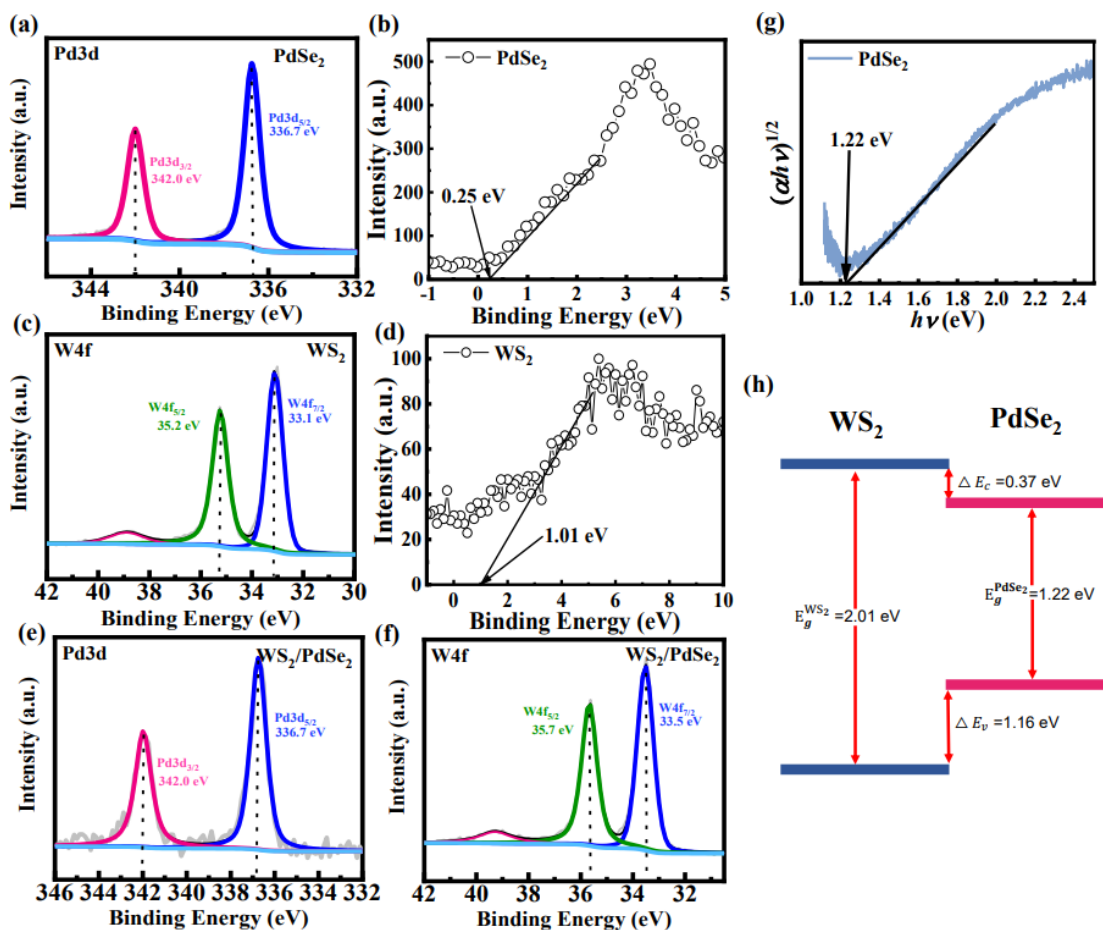

**Figure S1.** (a) The core-level Pd3d from trilayer PdSe<sub>2</sub>. (b) The valence band spectrum obtained from trilayer PdSe<sub>2</sub>. (c) The core-level W4f obtained from

monolayer WS<sub>2</sub>. (d) The valence band spectrum obtained from monolayer WS<sub>2</sub>. (e) The core-level Pd3d from WS<sub>2</sub>/PdSe<sub>2</sub> heterostructure. (f) The core-level W4f obtained from WS<sub>2</sub>/PdSe<sub>2</sub> heterostructure. (g) Indirect bandgap calculation of trilayer PdSe<sub>2</sub>. (h) The schematic illustration of the band alignment of the WS<sub>2</sub>/PdSe<sub>2</sub> heterostructure.

## 2. Computation Method:

All computations were carried out within the density functional theory (DFT) methods implemented in the Vienna ab initio simulation package. In the theoretical calculation process, the generalized gradient approximation PBE (GGA-PBE) of the exchange and correlation functionals were used. The cutoff energy of the selected plane wave function is 400 eV. In the calculation of geometric relaxation and single point energy, the convergence criterion for energy is  $10^{-6}$  eV, and the convergence criterion for force is 0.015 eV/Å. Meanwhile, in order to avoid the influence of periodic effects on the two-dimensional structure, we established a 20 Å vacuum layer in the z-direction. For computing the band structure of the PdSe<sub>2</sub>, the Brillouin zone of  $\Gamma$ -X-S-Y- $\Gamma$  was selected. For monolayer WS<sub>2</sub>, the Brillouin zone of  $\Gamma$ -M-K- $\Gamma$  was chosen. The band structure of PdSe<sub>2</sub> crystal exhibits an indirect bandgap. It can be observed that the CBM and VBM of monolayer WS<sub>2</sub> are located at point K, and the CBM and VBM of monolayer, bilayer, and trilayer PdSe<sub>2</sub> are all located between the CBM and VBM of monolayer WS<sub>2</sub>. Through theoretical calculations of band alignment, it can be reasonably concluded that WS<sub>2</sub>/1L-PdSe<sub>2</sub>, WS<sub>2</sub>/2L-PdSe<sub>2</sub>, WS<sub>2</sub>/3L-PdSe<sub>2</sub> are both type I heterostructures.

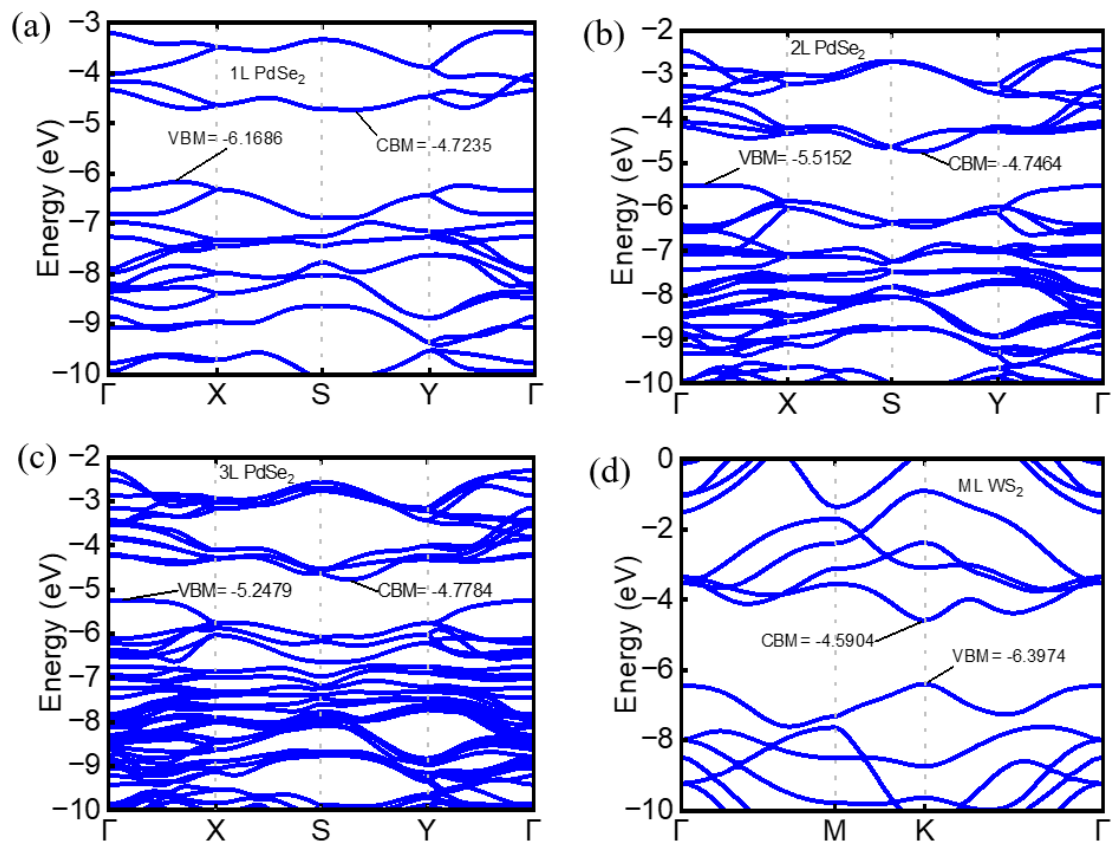

**Figure S2.** (a)-(c) Calculated bandstructure for the PdSe<sub>2</sub> (1-3 layers). (d) Calculated bandstructure for the monolayer WS<sub>2</sub>.
